# Supplementary material for: Lithium decorated 2D orthorhombic (o)-B2X2 monolayers for hydrogen storage: first principles calculations
Source: Royal Society of Chemistry journal article supplement (doi:10.1039/d4se00173g), 2024-01-01
Supplement: d4se00173g1.pdf [file d4se00173g1.pdf]

## Supplementary information

# Lithium decorated 2D orthorhombic (o)- $B_2X_2$ monolayers for hydrogen storage: first principles calculations<sup>†</sup>

Ayoub Benaddi,\* Abdelali Elomrani, Mohammed Lamhani, Said Oukahou, Mohammad Maymoun ,  
Mohamed Yassine Fatihi and Abdellatif Hasnaoui

Sultan Moulay Slimane University of Beni Mellal, Polydisciplinary Faculty of Khouribga, LS2ME Laboratory, B.P. 145, 25000  
Khouribga, Morocco

E-mail: ayoub.benaddi@usms.ma

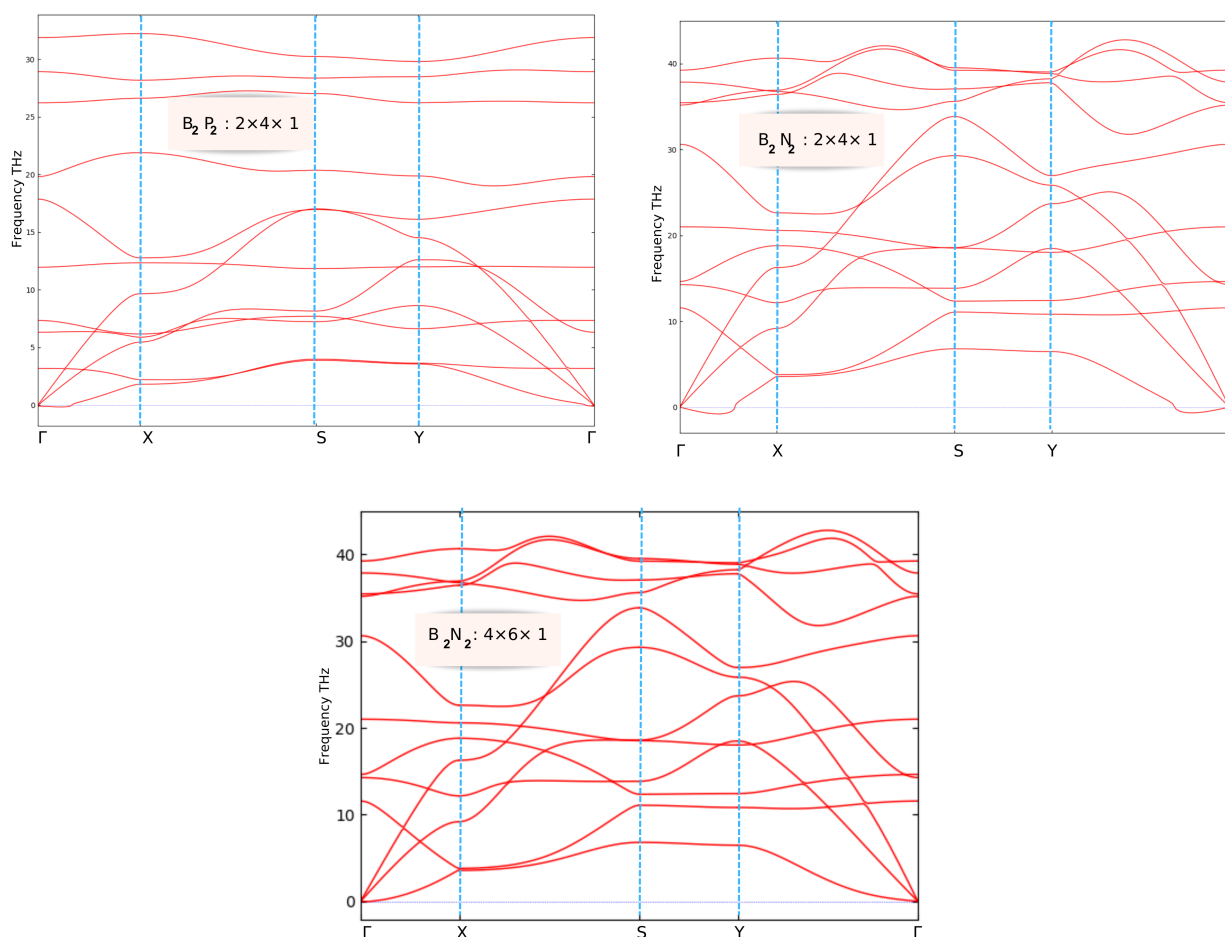

**Fig. S1** Phonon dispersions of the 2D orthorhombic (o)- $B_2P_2$  and (o)- $B_2N_2$  materials, following a Brillouin zone path of  $\Gamma-X-S-Y-\Gamma$ .

<sup>†</sup>\*E-mail: ayoub.benaddi@usms.ma

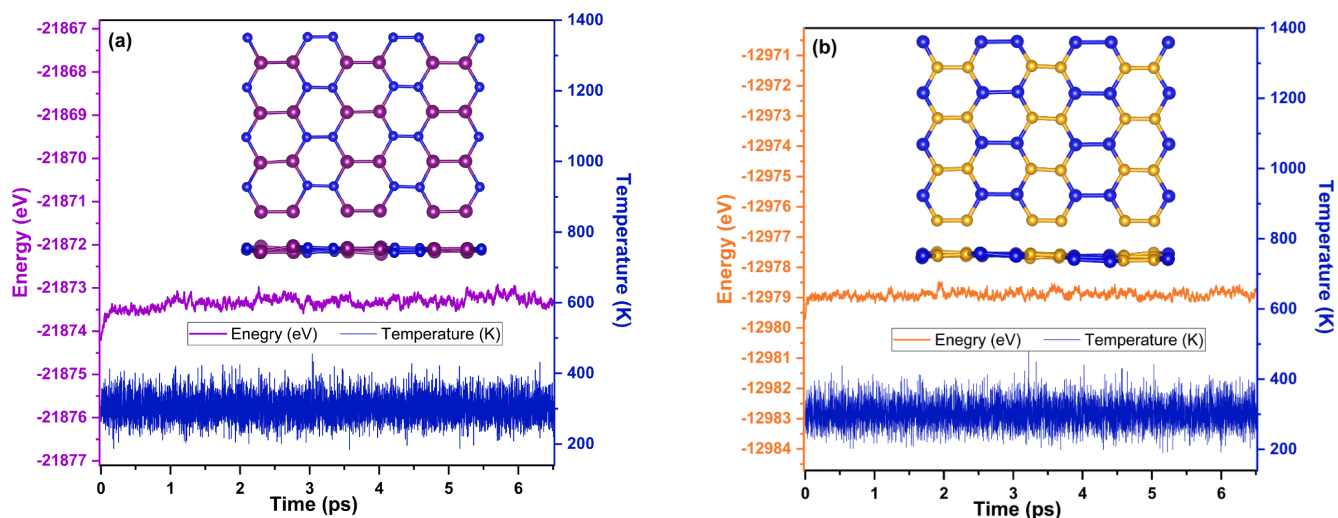

**Fig. S2** AIMD results of 2D (a) (o)-B<sub>2</sub>P<sub>2</sub> and (b) (o)-B<sub>2</sub>N<sub>2</sub> monolayers at 300 K. The total energy and temperature fluctuations with respect to time are shown by orange and blue lines, respectively. The insert structures are the snapshots after 6.5 ps

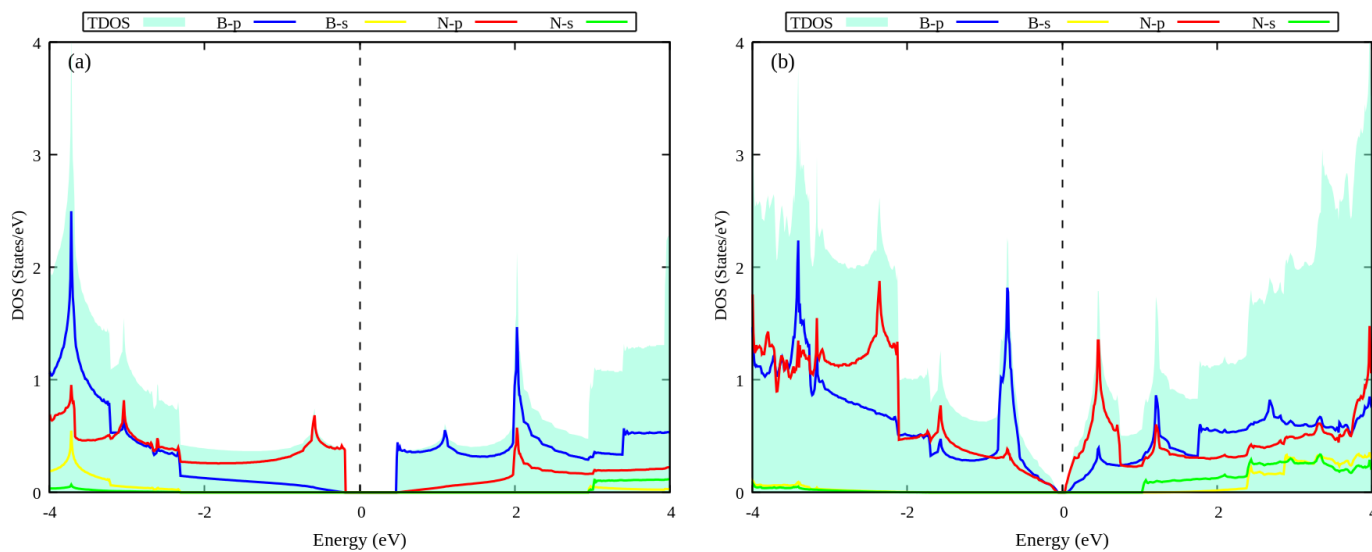

**Fig. S3** (a) and (b) Projected density of states (PDOS) of (o)-B<sub>2</sub>N<sub>2</sub> and (o)-B<sub>2</sub>P<sub>2</sub>, respectively, calculated using GGA-PBE method.

<sup>0</sup>\*E-mail: ayoub.benaddi@usms.ma

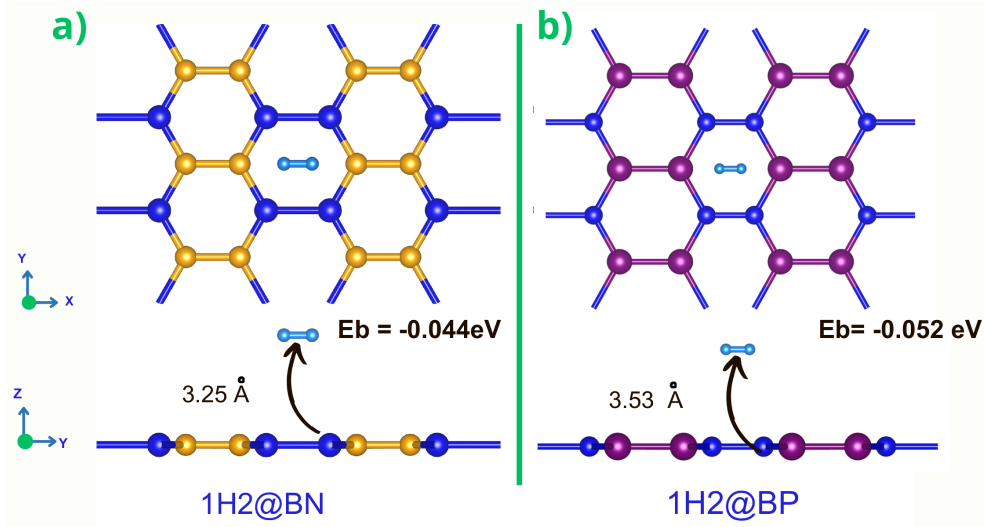

**Fig. S4** Optimized atomic structure of o-B<sub>2</sub>N<sub>2</sub> and o-B<sub>2</sub>P<sub>2</sub> with single H<sub>2</sub> molecule adsorbed on each monolayer at the most stable site, H1-site. The corresponding binding energy and distance between the molecule and the monolayer are also illustrated.

**Table. S1** Binding energy of adsorbed single lithium atom in the seven possible sites of B<sub>2</sub>N<sub>2</sub> and B<sub>2</sub>P<sub>2</sub> monolayers

| B <sub>2</sub> N <sub>2</sub> sites |          |          |                    |                    |            |                  |                  |
|-------------------------------------|----------|----------|--------------------|--------------------|------------|------------------|------------------|
|                                     | hollow 1 | hollow 2 | top of B           | top of N           | bridge B-B | bridge B-N       | bridge N-N       |
| Binding energy (eV)                 | -1.98    | -1.70    | -1.43              | -1.58              | -1.58      | -1.98            | -1.40            |
| Stability                           | stable   | stable   | stable             | not stable         | stable     | not stable       | stable           |
| Description                         | —        | —        | —                  | goes to N-N bridge | —          | goes to hollow 1 | —                |
| B <sub>2</sub> P <sub>2</sub> sites |          |          |                    |                    |            |                  |                  |
|                                     | hollow 1 | hollow 2 | top of B           | top of P           | bridge B-B | bridge B-P       | bridge P-P       |
| Binding energy (eV)                 | -3.09    | -2.82    | -2.61              | -3.08              | -2.61      | -3.08            | -2.82            |
| Stability                           | stable   | stable   | not stable         | not stable         | stable     | not stable       | not stable       |
| Description                         | —        | —        | goes to B-B bridge | goes to hollow 1   | —          | goes to hollow 1 | goes to hollow 2 |

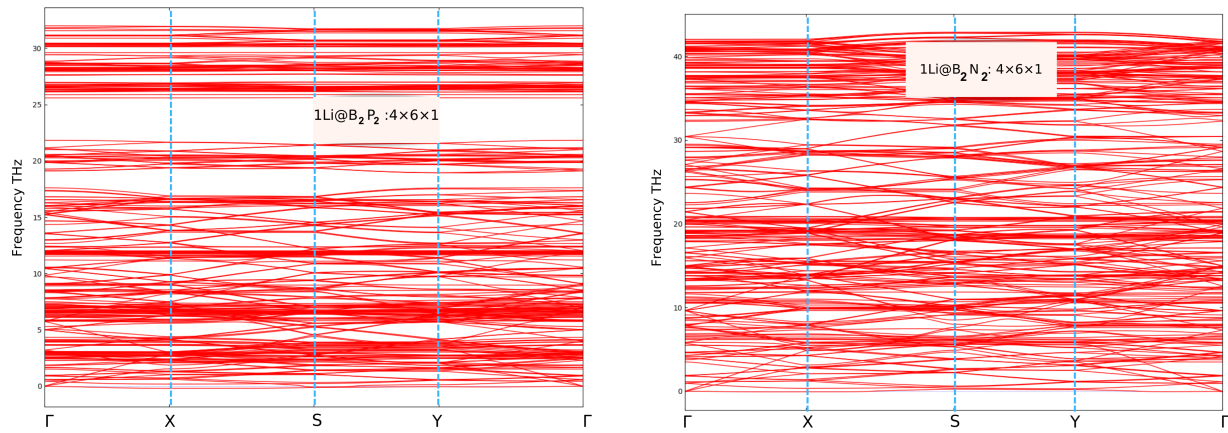

**Fig. S5** Phonon dispersions of Li@B<sub>2</sub>P<sub>2</sub> and Li@B<sub>2</sub>N<sub>2</sub> systems, following a Brillouin zone path of  $\Gamma$ -X-S-Y- $\Gamma$ .

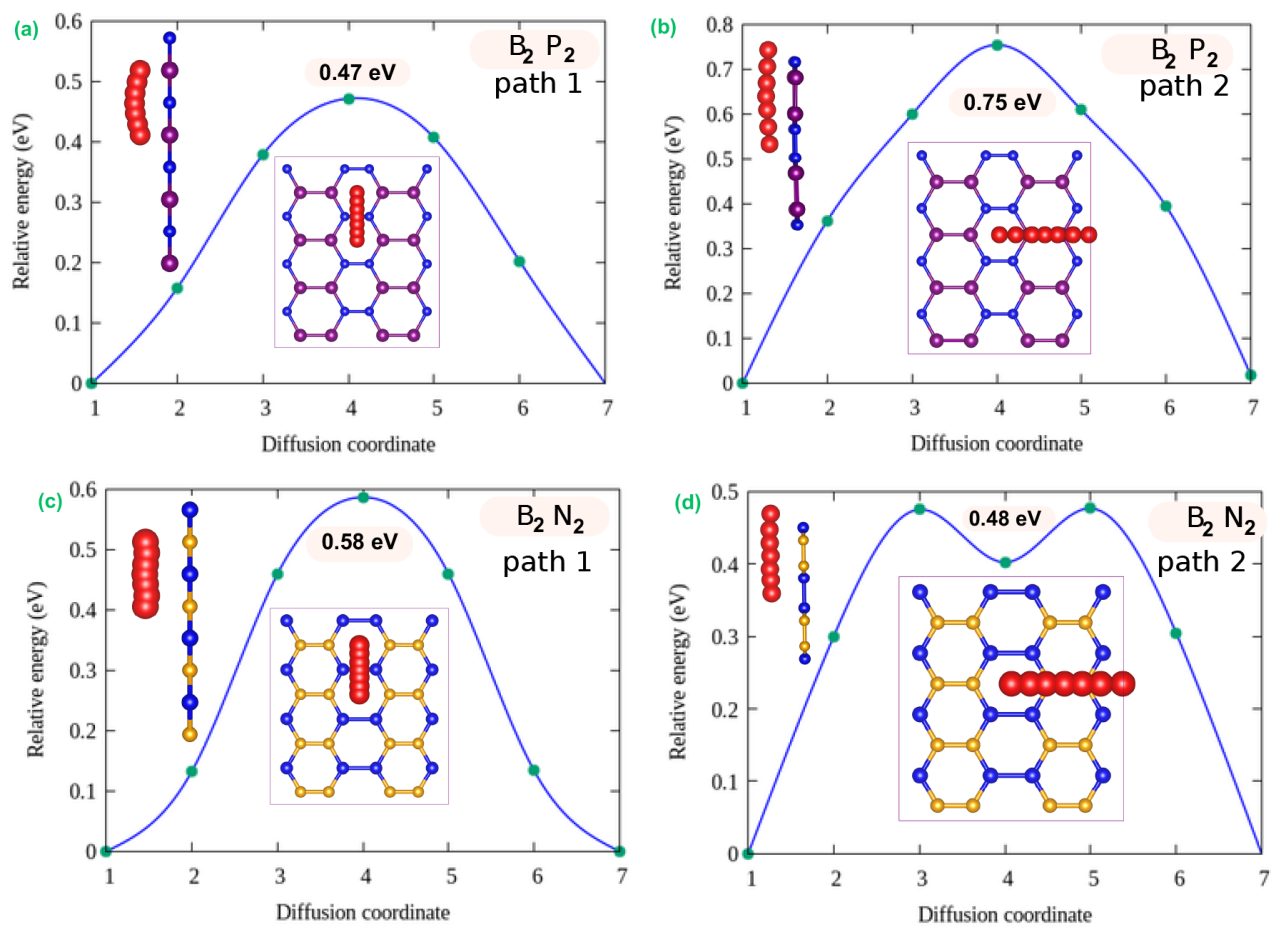

**Fig. S6** (a), (b), (c) and (d), Lithium atom displacement following two paths from one stable configuration to the other on  $B_2P_2$  and  $B_2N_2$  monolayers. The energy profiles are shown by the blue curves.

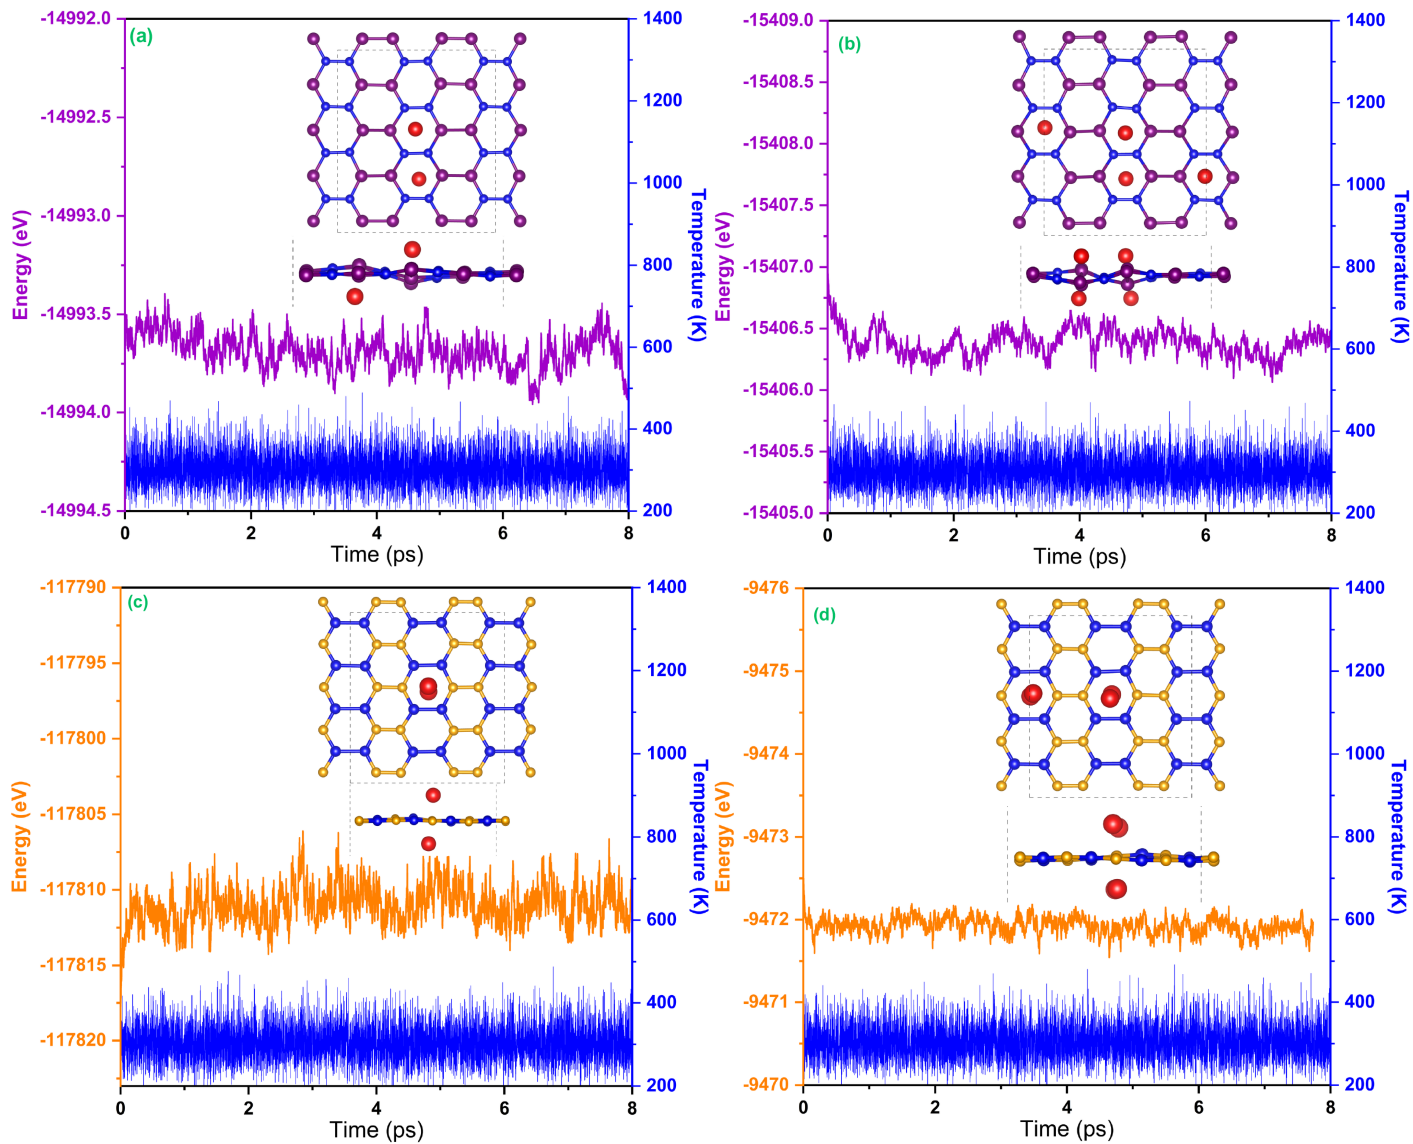

**Fig. S7** (a), (b), (c) and (d) AIMD results of  $2\text{Li}@B_2P_2$ ,  $4\text{Li}@B_2P_2$ ,  $2\text{Li}@B_2N_2$  and  $4\text{Li}@B_2N_2$  systems, respectively, at 300 K. The total energy and temperature fluctuations with respect to time are shown by orange, purple and blue lines, respectively. The insert structures are the snapshots after 8 ps.

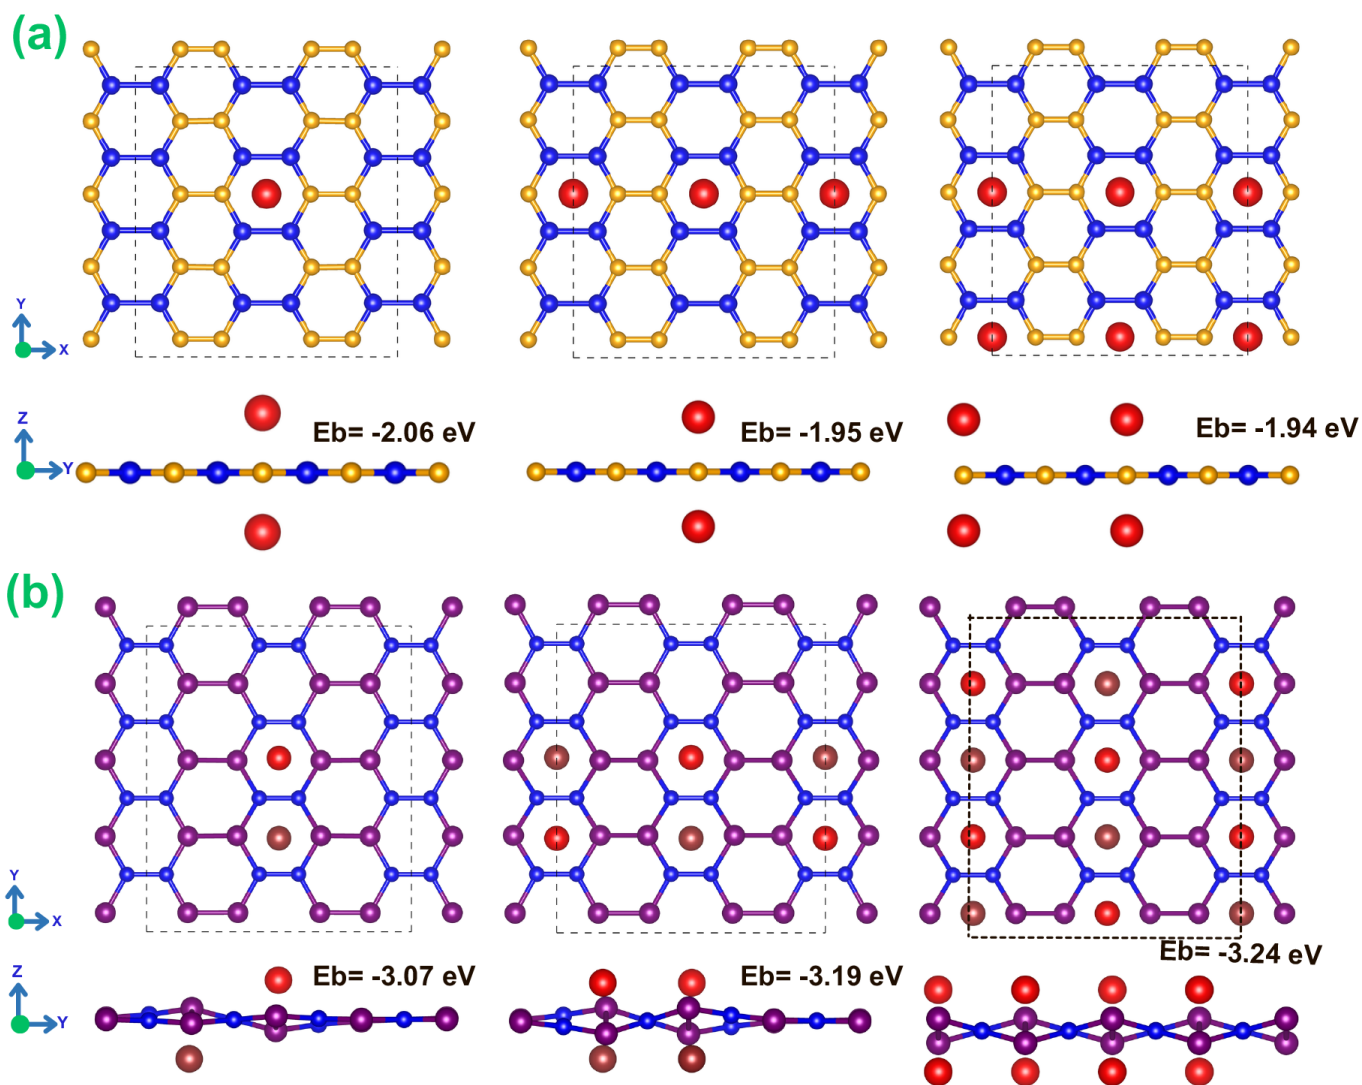

**Fig. S8** (a) and (b) The most favorable atomic configurations of 2, 4, and 8 double-sided lithium atoms adsorbed in the most stable site (hollow 1) for  $2 \times 4 \times 1$  o-B<sub>2</sub>N<sub>2</sub> and o-B<sub>2</sub>P<sub>2</sub> supercells respectively, as well as the corresponding binding energies.
